# Supplementary material
Source: publisher figshare collection journal article supplement (https://acs.figshare.com/ndownloader/files/4596787)
Supplement: Supplementary file 1 [file 4596787]

## Supporting Information

### **Colloidal Chromium-Doped $\text{In}_2\text{O}_3$ Nanocrystals as Building Blocks for High- $T_C$ Ferromagnetic Transparent Conducting Oxide Structures**

Shokouh S. Farvid, Ling Ju, Matthew Worden, and Pavle V. Radovanovic\*

*Department of Chemistry, University of Waterloo, 200 University Avenue West,  
Waterloo, Ontario N2L 3G1, Canada*

Email: pavler@sciborg.uwaterloo.ca

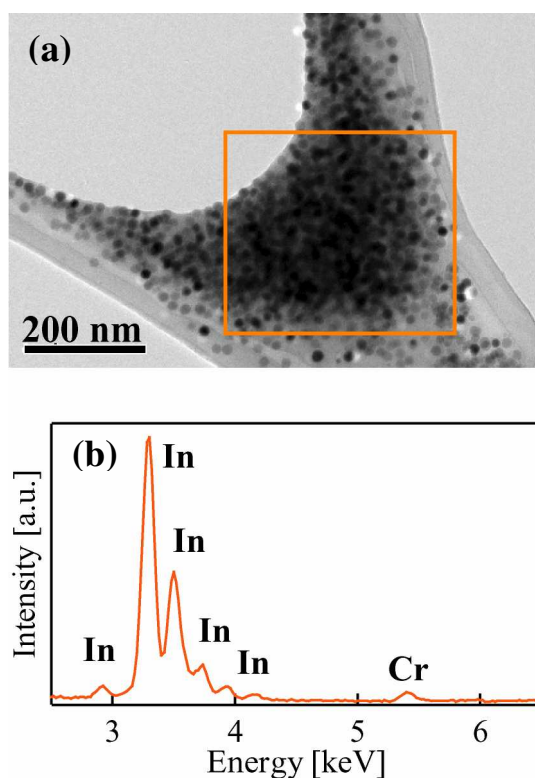

**Figure S1.** (a) STEM image of a large number of  $\text{Cr}^{3+}:\text{In}_2\text{O}_3$  NCs as described in the text. The region analyzed with EDX spectroscopy is marked with the orange rectangle. (b) EDX spectrum of the designated region in a).

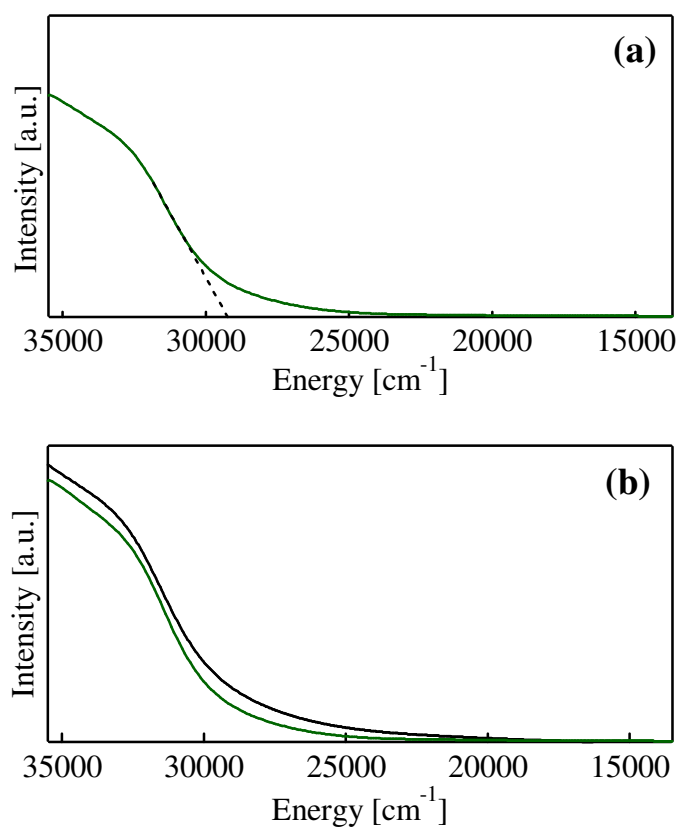

**Figure S2.** (a) Absorption spectrum of 2.7 % Cr<sup>3+</sup>:In<sub>2</sub>O<sub>3</sub> NCs. The dashed line is a fit to the low-energy tail of the band gap, from which the band gap energy is estimated to be 30250 cm<sup>-1</sup> (ca. 3.75 eV). This value is in a very good agreement with the In<sub>2</sub>O<sub>3</sub> band gap energy reported for a similar spectrum in reference 8. (b) Absorption spectra of pure In<sub>2</sub>O<sub>3</sub> (black trace) and Cr<sup>3+</sup>:In<sub>2</sub>O<sub>3</sub> (green trace) NCs showing nearly identical band gap energies.

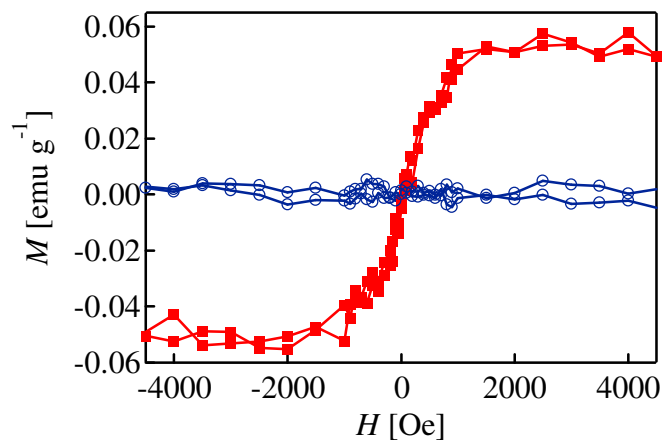

**Figure S3.**  $M$  vs.  $H$  data for  $\text{In}_2\text{O}_3$  nanocrystalline film (blue circles) measured at 300 K, showing no ferromagnetic ordering. Hysteresis loop for 2.7 %  $\text{Cr}^{3+}:\text{In}_2\text{O}_3$  nanocrystalline film (red circles) recorded at 300 K is shown for comparison. Both loops were corrected for diamagnetic contribution.

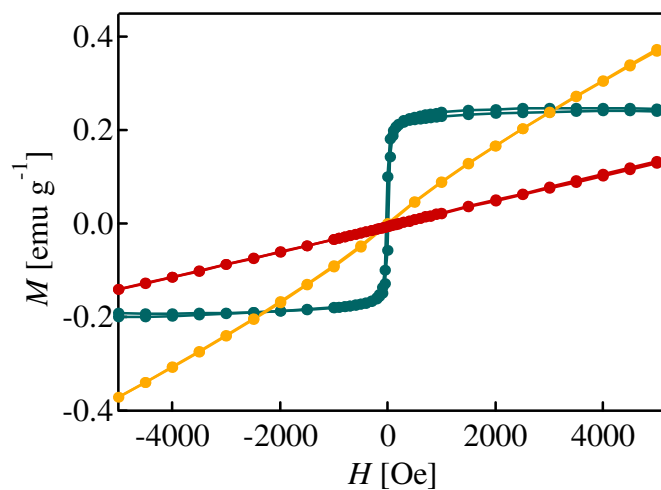

**Figure S4.**  $M$  vs.  $H$  data for nanocrystalline  $\text{Cr}_2\text{O}_3$  measured at 5 K (blue-green dots), 100 K (yellow dots) and 300 K (red dots). No ferromagnetic ordering is observed at 300 K, while the sample is superparamagnetic at 5 K and very weakly superparamagnetic at 100 K.
